1 **Title: GNS561, a clinical-stage PPT1 inhibitor, has powerful antitumor activity against**  
2 **hepatocellular carcinoma via modulation of lysosomal functions**

3

4 Sonia Brun<sup>1, #, \*, 15</sup>, Eric Raymond<sup>1, 2, #</sup>, Firas Bassissi<sup>1</sup>, Zuzana Macek Jilkova<sup>3, 4, 5</sup>, Soraya  
5 Mezouar<sup>1</sup>, Madani Rachid<sup>1</sup>, Marie Novello<sup>1</sup>, Jennifer Tracz<sup>1</sup>, Ahmed Hamai<sup>6, 7</sup>, Gilles  
6 Lalmanach<sup>8, 9</sup>, Lise Vanderlynden<sup>8, 9</sup>, Eloïne Bestion<sup>1, 10</sup>, Raphael Legouffe<sup>11</sup>, Jonathan  
7 Stauber<sup>12</sup>, Thomas Schubert<sup>13</sup>, Maximilian G. Plach<sup>13</sup>, Jérôme Courcambeck<sup>1</sup>, Cyrille Drouot<sup>1</sup>,  
8 Guillaume Jacquemot<sup>1</sup>, Cindy Serdjebi<sup>1</sup>, Gael Roth<sup>3, 4, 5</sup>, Jean-Pierre Baudoin<sup>14</sup>, Christelle  
9 Ansaldi<sup>1</sup>, Thomas Decaens<sup>3, 4, 5, #</sup> and Philippe Halfon<sup>1, #, \*</sup>

10

11 <sup>1</sup>Genoscience Pharma, Marseille, France

12 <sup>2</sup>Medical Oncology, Paris Saint-Joseph Hospital, Paris, France

13 <sup>3</sup>Institute for Advanced Biosciences, Research Center UGA / Inserm U 1209 / CNRS 5309, La  
14 Tronche, France

15 <sup>4</sup>University Grenoble Alpes, Faculté de médecine, France

16 <sup>5</sup>Clinique Universitaire d'Hépatogastroentérologie, Pôle Digidune, CHU Grenoble, France

17 <sup>6</sup>Institut Necker-Enfants Malades, Inserm U1151-CNRS UMR 8253, Paris, France

18 <sup>7</sup>University Paris Descartes-Sorbonne Paris Cité, Paris, France

19 <sup>8</sup>INSERM, UMR1100, Centre d'Etude des Pathologies Respiratoires, Equipe "Mécanismes  
20 Protéolytiques dans l'Inflammation", Tours, France

21 <sup>9</sup>Tours University, Tours, France

22 <sup>10</sup>CNRS, IRD, MEPHI, IHU Méditerranée Infection, Aix Marseille University, Marseille, France

23 <sup>11</sup>ImaBiotech, Loos, France

24 <sup>12</sup>ImaBiotech, Billerica, USA

25 <sup>13</sup>2Bind GmbH, Regensburg, Germany

26 <sup>14</sup>Aix Marseille University, IRD, APHM, MEPHI, IHU Méditerranée Infection, Marseille, France

27 <sup>15</sup>Lead contact

28 # These authors contributed equally

29 \*Correspondence: [brun.sonia@hotmail.fr](mailto:brun.sonia@hotmail.fr) and [p.halfon@genosciencepharma.com](mailto:p.halfon@genosciencepharma.com)

30

31 **SUMMARY**

32 Hepatocellular carcinoma (HCC) is the most frequent primary liver cancer. Autophagy  
33 inhibitors have been extensively studied in cancer but, to date, none has reached efficacy in  
34 clinical trials. In this study, we demonstrated that GNS561, a new autophagy inhibitor,  
35 whose anticancer activity was previously linked to lysosomal cell death, displayed high liver  
36 tropism and potent antitumor activity against a panel of human cancer cell lines and in two  
37 HCC in vivo models. We showed that GNS561, which is an effective lysosomotropic agent,  
38 can reach and inhibit its enzyme target, palmitoyl-protein thioesterase 1, resulting in  
39 lysosomal unbound  $Zn^{2+}$  accumulation, impairment of cathepsin activity, blockage of  
40 autophagic flux, altered location of mTOR, lysosomal membrane permeabilization, caspase  
41 activation and cell death. Accordingly, GNS561, currently tested in a global Phase 1b/2a  
42 clinical trial against primary liver cancer, represents a promising new drug candidate and a  
43 hopeful therapeutic strategy in cancer treatment.

44

45 **Keywords:** GNS561, liver cancer, lysosome, PPT1, autophagy, lysosomotropism, antitumor,  
46 zinc, mTOR

47

48

## 49 INTRODUCTION

50 With an estimated 782,000 deaths in 2018, hepatocellular carcinoma (HCC) stands as the  
51 most common primary liver cancer and constitutes the fourth leading cause of cancer-  
52 related death worldwide (Bray et al. 2018). The rising incidence of HCC, the high worldwide  
53 mortality rate, and limited therapeutic options at advanced stages, make HCC a significant  
54 unmet medical need.

55 Autophagy-related lysosomal cell death, either alone or in connection with several other cell  
56 death pathways, has been recognized as a major target for cancer therapy (Aits and Jaattela  
57 2013). Dysregulated autophagic-lysosomal activity and mTOR signaling were shown to allow  
58 cancer cells to become resistant to the cellular stress induced by chemotherapy and targeted  
59 therapy (Klempner et al. 2013). Recently, several lysosome-specific inhibitors were shown to  
60 target palmitoyl-protein thioesterase 1 (PPT1), resulting in the modulation of protein  
61 palmitoylation and antitumor activity in melanoma and colon cancer models (Rebecca et al.  
62 2017, Rebecca et al. 2019). PPT1 palmitoylates proteins, enabling their degradation and  
63 intracellular trafficking of membrane-bound proteins. This process was shown to play a  
64 central role in the control of cellular autophagy. PPT1 was reported to be highly expressed in  
65 several cancer cell lines as well as in advanced stage cancers in patients (Rebecca et al.  
66 2019).

67 Chloroquine (CQ) and hydroxychloroquine (HCQ) have been used for more than 50 years to  
68 prevent and treat malarial infections and autoimmune diseases. Based on the  
69 lysosomotropic properties and the capacity for autophagy inhibition, these molecules have  
70 been proposed as active drugs in cancer (Dolgin 2019, Pérez-Hernández et al. 2019) and  
71 have been extensively investigated in recent years (Kimura et al. 2013, Manic et al. 2014,  
72 Zhang et al. 2015, Shi et al. 2017, Verbaanderd et al. 2017, Xu et al. 2018). Over 40 clinical  
73 trials have been reported to evaluate the activity of both CQ or HCQ as single agent or in  
74 combination with chemotherapy in several tumor types (Manic et al. 2014, Shi et al. 2017,  
75 Verbaanderd et al. 2017). However, the required drug concentrations to inhibit autophagy  
76 were not achieved in humans, leading to inconsistent results in cancer clinical trials (Pascolo  
77 2016, Rebecca et al. 2017, Plantone and Koudriavtseva 2018). This prompted research to  
78 identify novel compounds with potent inhibitory properties against autophagy for cancer  
79 therapy.

80 We previously reported that GNS561 was efficient in intrahepatic cholangiocarcinoma (iCCA)  
81 by inhibiting late-stage autophagy and inducing a dose-dependent build-up of enlarged  
82 lysosomes (Brun et al. 2019). In this study, we investigated the lysosomotropism of GNS561  
83 and then the disruption of related lysosomal functions such as autophagy and lysosomal  
84 enzymatic activity. We also identified lysosomal PPT1 as a target GNS561. Exposure to  
85 GNS561 was shown to induce lysosomal unbound zinc ion ( $Zn^{2+}$ ) accumulation, inhibition of  
86 PPT1 and cathepsin activity, blockage of autophagic flux and mTOR displacement.  
87 Interestingly, these effects resulted in lysosomal membrane permeabilization (LMP) and  
88 caspase activation that led to cancer cell death. This mechanism was associated with dose-  
89 dependent inhibition of cancer cell proliferation and tumor growth inhibition in several HCC  
90 in vivo models. These data establish PPT1 and lysosomes as major targets for cancer cells  
91 and led to the development of a clinical program investigating the effects of GNS561 in  
92 patients with advanced HCC.

93

94

95 **RESULTS**

96 **GNS561 displays activity against human cancer cell lines and patient-derived cells**

97 The effects of GNS561 on cell viability were investigated in a panel of human cancer cell  
 98 lines, including HCC, iCCA and colon, renal cell, breast, prostate, lung, and ovarian carcinoma  
 99 as well as acute myeloid leukemia, glioblastoma, and melanoma. As shown in Table 1,  
 100 GNS561 showed potent antitumor activity ranging from  $0.22 \pm 0.06 \mu\text{M}$  for the most  
 101 sensitive cell line (LN-18, a glioblastoma cell line) to  $7.27 \pm 1.71 \mu\text{M}$  for the least sensitive cell  
 102 line (NIH:OVCAR3, an ovarian cancer cell line). GNS561 was at least 10-fold more effective  
 103 than HCQ in cultured cancer cells. GNS561 also displayed activity in primary HCC patient-  
 104 derived cells and was on average 3-fold more potent than sorafenib, a reference drug in HCC  
 105 treatment (mean  $\text{IC}_{50}$   $3.37 \pm 2.40 \mu\text{M}$  for GNS561 vs  $10.43 \pm 4.09 \mu\text{M}$  for sorafenib).

| Cancer type            | Cell lines | Mean $\text{IC}_{50} \pm \text{SD}$ ( $\mu\text{M}$ ) |                   | Primary HCC patient-derived cells | $\text{IC}_{50}$ ( $\mu\text{M}$ ) |                  |
|------------------------|------------|-------------------------------------------------------|-------------------|-----------------------------------|------------------------------------|------------------|
|                        |            | GNS561                                                | HCQ               |                                   | GNS561                             | sorafenib        |
| Colon Carcinoma        | HCT-116    | $1.22 \pm 0.15$                                       | $14.41 \pm 1.5$   | LI0050                            | 3.54                               | 9.12             |
|                        | HT-29      | $1.35 \pm 0.04$                                       | $24.18 \pm 5.14$  | LI0574                            | 2.41                               | 8.65             |
| Renal Cell Carcinoma   | 786-O      | $1.72 \pm 0.17$                                       | $21.65 \pm 3.15$  | LI0612                            | 6.93                               | 17.94            |
|                        | CAKI-1     | $1.10 \pm 0.19$                                       | $17.69 \pm 1.29$  | LI0752                            | 0.49                               | 6.34             |
| Ovarian Cancer         | NIH:OVCAR3 | $7.27 \pm 1.71$                                       | $98.01 \pm 12.75$ | LI0801                            | 2.07                               | 5.7              |
| Melanoma               | A375       | $1.2 \pm 0.13$                                        | $12.27 \pm 2.8$   | LI1005                            | 3.16                               | 14.49            |
|                        | SK-MEL-28  | $1.81 \pm 0.5$                                        | $22.78 \pm 2.65$  | LI1098                            | 6.95                               | 10.85            |
| Breast Cancer          | MDA-MB-231 | $2.17 \pm 0.14$                                       | $14.13 \pm 3.06$  | LI1646                            | 1.44                               | 10.33            |
| Prostate Cancer        | DU-145     | $1.09 \pm 0.18$                                       | $45.74 \pm 0.55$  | Mean                              | $3.37 \pm 2.40$                    | $10.43 \pm 4.09$ |
|                        | PC-3       | $2.56 \pm 0.23$                                       | $43.43 \pm 6.04$  |                                   |                                    |                  |
| Lung Cancer            | A549       | $1.69 \pm 0.34$                                       | $14.33 \pm 1.59$  |                                   |                                    |                  |
|                        | NCI-H358   | $2.54 \pm 0.34$                                       | $54.07 \pm 14.19$ |                                   |                                    |                  |
| HCC                    | HepG2      | $0.47 \pm 0.15$                                       | $11.55 \pm 1.52$  |                                   |                                    |                  |
|                        | Huh7       | $0.88 \pm 0.31$                                       | $13.62 \pm 0.71$  |                                   |                                    |                  |
| Glioblastoma           | LN-229     | $0.60 \pm 0.24$                                       | $10.87 \pm 1.23$  |                                   |                                    |                  |
|                        | LN-18      | $0.22 \pm 0.06$                                       | $5.27 \pm 0.74$   |                                   |                                    |                  |
| Acute Myeloid Leukemia | KG-1       | $5.86 \pm 1.64$                                       | $43.92 \pm 2.76$  |                                   |                                    |                  |
|                        | Mean       | $1.99 \pm 1.86$                                       | $27.52 \pm 23.28$ |                                   |                                    |                  |

106 **Table 1.** In vitro activity of GNS561 and HCQ in human cancer cell lines (left,  $IC_{50} \pm SD$ ,  $\mu M$ )  
107 and in vitro activity of GNS561 and sorafenib in primary hepatocellular carcinoma (HCC)  
108 patient-derived cells (right,  $IC_{50}$ ,  $\mu M$ ).

109

#### 110 **GNS561 has antitumor properties in HCC in vivo models**

111 The whole-body tissue distribution of GNS561 was investigated in rats after repeated oral  
112 administration of GNS561 at a dose of 40 mg/kg/day for 28 days. Seven hours after the last  
113 administration, the GNS561 level was measured by mass spectrometry imaging in the liver,  
114 lung, stomach, brain, eye, salivary gland, kidney, heart, fat, muscle, testis, and skin (Figure 1).  
115 GNS561 mainly accumulated in the liver, stomach and lung as shown by the calculated  
116 organ/blood ratio (Figure 1B). Lower concentrations of GNS561 were also detected in eyes,  
117 skin, brain and testis, indicating that GNS561 crosses the blood/brain barrier and the  
118 blood/testis barrier to a limited extent (brain to blood and testis to blood ratios were 0.21  
119 and 0.40, respectively).

120

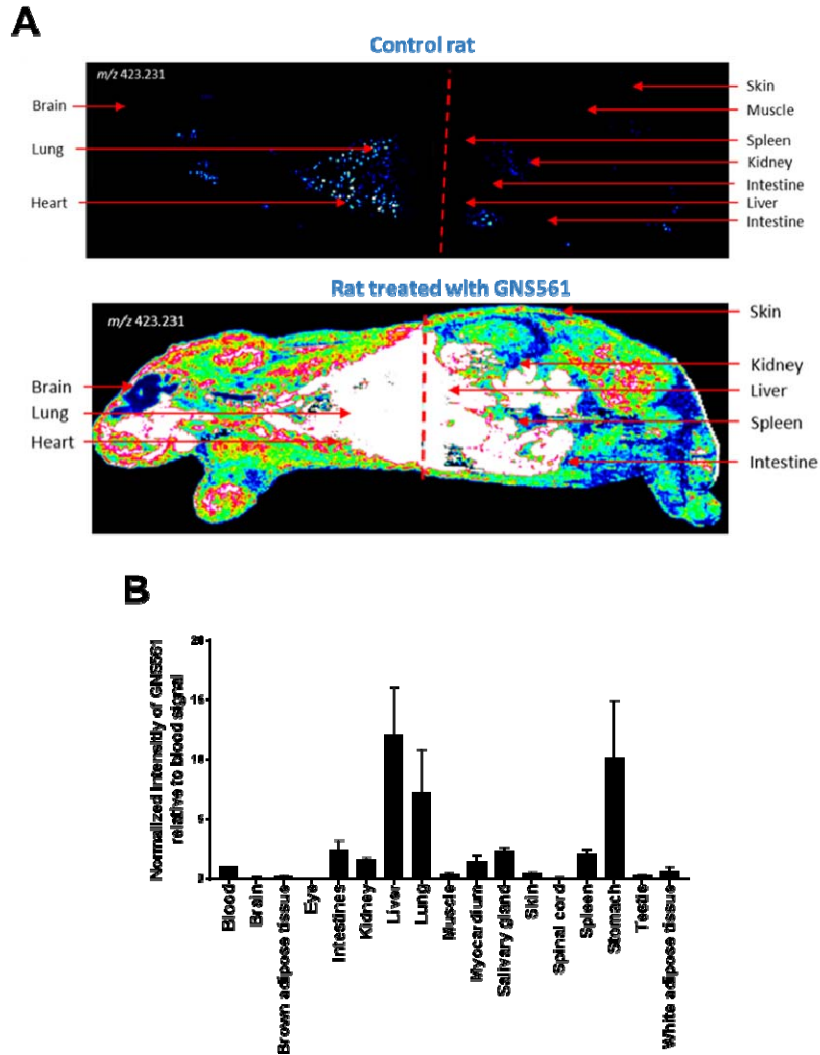

121

122

123 **Figure 1. Whole body tissue distribution of GNS561.** (A) Mass spectrometry imaging of a  
124 control rat (top) and a rat treated with GNS561 at a dose of 40 mg/kg/day for 28 days  
125 (bottom). (B) Normalized intensity of GNS561 relative to blood signal in several organs of  
126 GNS561-treated rats (Mean + SEM, n=2 except for eye, n=1). Of note, the GNS561 liver-to-  
127 blood ratio is underestimated due to liver signal saturation.

128

129 Based on the high concentrations of GNS561 in the liver and potent in vitro activity against  
130 HCC cells, the effects of GNS561 were investigated in vivo using two liver cancer models,  
131 including the human HCC orthotopic patient-derived LI0752 xenograft mouse model and the  
132 diethylnitrosamine (DEN)-induced immunocompetent rat HCC model.

133 In the HCC patient-derived LI0752 xenograft BALB/c nude mouse model, tumor volume and  
134 weight were reduced by 37.1% and 34.4%, respectively, in mice treated with GNS561 at 50

135 mg/kg compared to the control (Figure S1A and B). Consistently, GNS561 treatment induced  
136 a decrease in serum AFP levels in a dose-dependent manner and was significantly different  
137 from the control at days 21 and 28 after treatment (Figure S1C-G).

138 Since HCC often develops in cirrhotic livers in humans, we further characterized the  
139 antitumor effects of GNS561 in a DEN-induced cirrhotic rat model of HCC. Rats with already  
140 developed HCC were either treated with sorafenib at 10 mg/kg, GNS561 at 15 mg/kg, or the  
141 combination of both drugs (Figure S2). In this model, tumor progression was significantly  
142 reduced by sorafenib (33.0%) and GNS561 (33.0%) compared to an untreated control group,  
143 and the greatest decrease in tumor progression was observed by the combination (68%) that  
144 displayed an additive effect (Figure 2A). Magnetic resonance imaging analyses further  
145 showed a significant increase in the mean tumor size of  $9.97 \pm 0.97$  mm in control rats  
146 compared to  $6.45 \pm 0.35$  mm with sorafenib,  $5.48 \pm 1.00$  mm in GNS561 and  $3.83 \pm 0.52$  mm  
147 in the combination group (Figure 2B). Following liver resection, the macroscopic counting of  
148 tumor nodules revealed significantly lower numbers in all treated groups compared to the  
149 control group (Figure 2C). Immunohistochemical analyses of liver tumors showed a  
150 significantly lower Cyclin D1-positive nuclear staining in the tumors of rats treated with  
151 GNS561 or by the combination of GNS561 with sorafenib compared to the control group  
152 (Figure 2D). GNS561 and combination treatments also significantly reduced Ki67 staining  
153 compared to the control group (Figure 2E). The effects on Cyclin D1 and Ki67 were primarily  
154 related to GNS561 exposure, as sorafenib alone showed no statistically significant  
155 differences in Cyclin D1 or Ki67 staining compared to the control group. Our results further  
156 showed that GNS561 and the combination treatment did not interfere with lipid or glucose  
157 metabolism or kidney function but slightly affected some liver functions (Table S1).

158



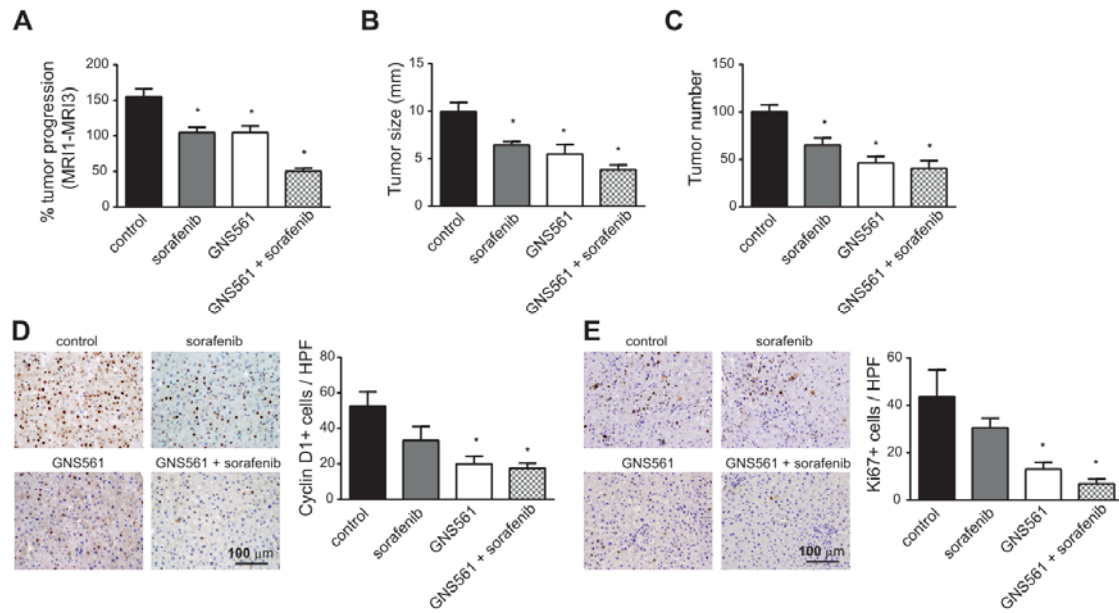

159

160

**Figure 2. GNS561 activity in a diethylnitrosamine-induced cirrhotic rat model of**

161

**hepatocellular carcinoma. (A) Tumor progression assessment by comparison of tumor size**

162

obtained by magnetic resonance imaging (MRI) 1 and MRI 3 in the control, sorafenib at 10

163

mg/kg, GNS561 at 15 mg/kg and combination (GNS561 + sorafenib) groups. Macroscopic

164

examination of livers with assessments of (B) tumor size and (C) tumor number at the

165

surface of livers. (D) Representative images of nuclear Cyclin D1 staining and quantification

166

of Cyclin D1-positive staining per high-power field (HPF). (E) Representative images of

167

nuclear Ki67-positive staining and quantification of Ki67 staining per HPF. For all studies,

168

mice  $n \geq 6$  per group. Data represent the mean + SEM. Comparison of means was performed

169

by one-way ANOVA with Dunnett's post hoc analysis. \* represents significant difference, at

170

least  $p < 0.05$ .

171

172

### **GNS561 activates the caspase-dependent apoptosis pathway**

173

We further wanted to characterize the antitumor effect of GNS561 and to determine

174

whether GNS561 could trigger apoptotic cell death. To this end, annexin V/propidium iodide

175

(PI) analysis was performed by flow cytometry after 48 h of GNS561 exposure in HepG2 cells.

176

Early (Annexin V+/PI- staining) and late (Annexin V+/PI+ staining) apoptosis increased in a

177

dose-dependent manner after GNS561 exposure (Figure 3A). The induction of apoptosis was

178

confirmed by immunodetection of poly-ADP-ribose polymerase cleavage in GNS561-treated

179

cells (Figure 3B). We further examined whether GNS561-induced apoptosis was related to

180 caspase activation. After 6 h of exposure, GNS561 had no effect on caspase 8 and caspase  
 181 3/7 activity in HepG2 cells (Figure 3C). In contrast, activation of caspase 8 and caspase 3/7  
 182 was observed after 24 h of treatment with GNS561, and this effect was sustained at 30 h. A  
 183 decrease in cell viability was concomitant with caspase activation (Figure 3C). The induction  
 184 of caspase activation was confirmed by flow cytometry (Figure 3D) and by detection of  
 185 cleavage of caspase 3 using immunoblot analysis (Figure 3E). Moreover, to confirm that  
 186 GNS561-induced cell death is caspase-dependent apoptosis, pretreatment (1 h) with the  
 187 cell-permeable pan-caspase inhibitor Z-VAD-FMK (5  $\mu$ M) was performed. Cell viability was  
 188 restored in the presence of Z-VAD-FMK (Figure 3F), further confirming that GNS561 induced  
 189 a caspase-dependent apoptotic cell death.

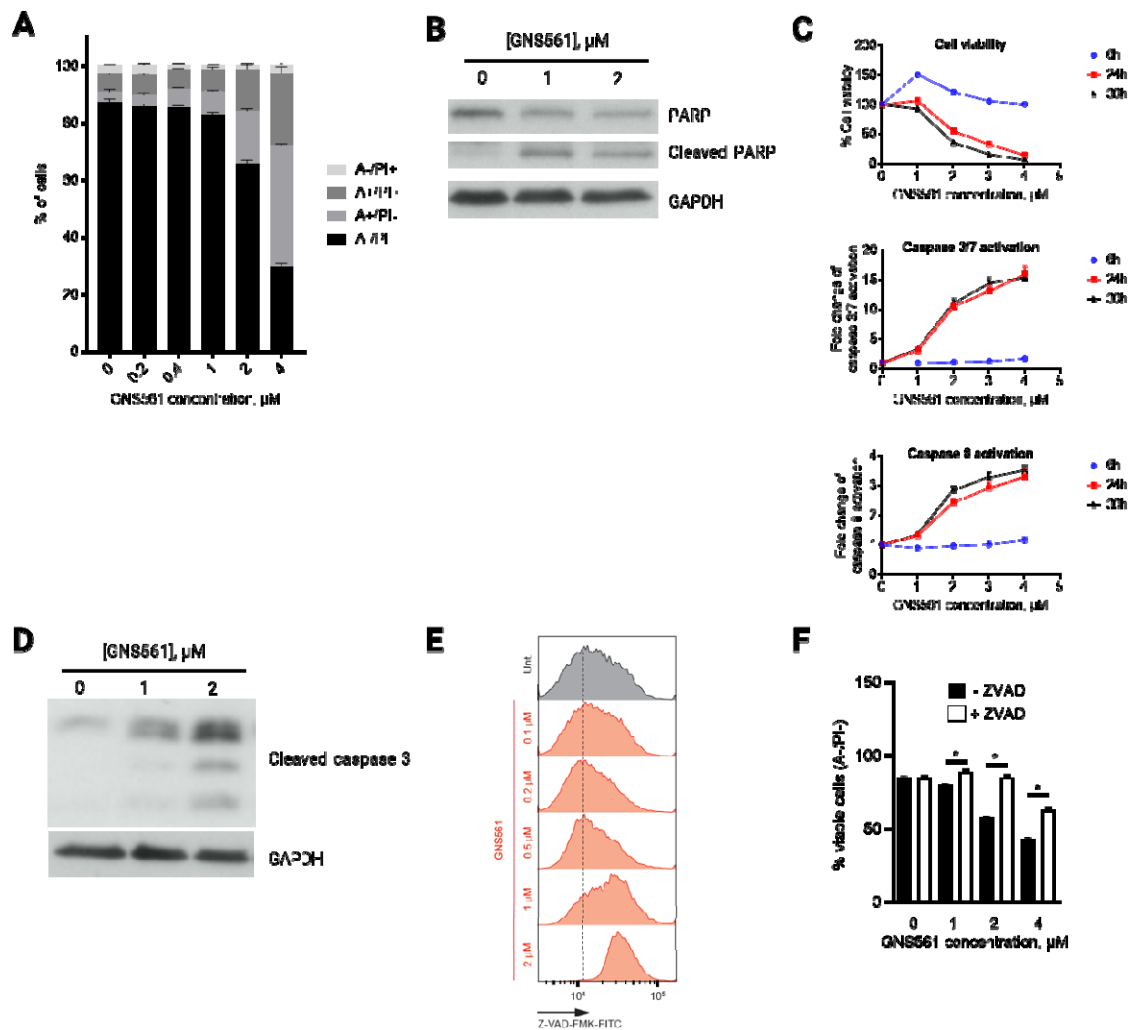

190

191 **Figure 3. GNS561 induces apoptotic cell death in HepG2 cells in a dose and time-dependent**

192 **manner through caspase activation.** (A) Annexin V (A)/propidium iodide (PI) analysis by flow

193 cytometry after 48 h of GNS561 treatment. (B) Representative immunoblotting of the  
194 cleaved and non-cleaved forms of poly-ADP-ribose polymer (PARP) after 24 h of GNS561  
195 treatment. (C) Cell viability and activation of caspase 3/7 and 8 after 6, 24 and 30 h of  
196 treatment with GNS561. (D) Representative immunoblotting of cleaved caspase 3 levels  
197 after 24 h of treatment with GNS561. (E) Caspase-glow analysis by flow cytometry after 48 h  
198 of treatment with GNS561. (F) Viable cell (A-/PI-) analysis by flow cytometry after  
199 pretreatment with Z-VAD-FMK (ZVAD) at 5  $\mu$ M for 1 h and then treatment with ZVAD at 5  
200  $\mu$ M and GNS561 for 48 h. For all blots, GAPDH was used as a loading control. For all studies,  
201  $n \geq 3$  biological replicates. Data represent the mean + SEM. For comparison, Student t-test  
202 was used. \* represents significant difference, at least  $p < 0.05$ .

203

#### 204 **GNS561 is a lysosomotropic agent**

205 The intracellular localization of GNS561 in HepG2 cells was visualized using GNS561D, the  
206 photoactivable analog of GNS561 containing a diazide moiety (Figure 4A). GNS561D showed  
207 a punctuate fluorescent signal that colocalized with the intracellular vesicle-like structure  
208 stained by LAMP1 (Figure 4B), demonstrating that GNS561 accumulated in lysosomes and is a  
209 lysosomotropic agent. Pretreatment with  $\text{NH}_4\text{Cl}$ , a weak base that rapidly increases  
210 lysosomal pH, was further used to validate the lysosomotropic character of GNS561. As  
211 shown in Figure 4B,  $\text{NH}_4\text{Cl}$  pretreatment strongly prevented lysosomal accumulation of  
212 GNS561D. Then, we investigated whether GNS561 lysosomotropism was related to induced  
213 cell death. For this purpose, HepG2 cells were pretreated for 2 h with  $\text{NH}_4\text{Cl}$  and then  
214 treated with GNS561 for 24 h. Although a concentration of 20 mM  $\text{NH}_4\text{Cl}$  alone slightly  
215 decreased viability (Figure 4C), it significantly attenuated the larger decrease in viability  
216 induced by GNS561. These results were confirmed by pretreatment with bafilomycin A1 (Baf  
217 A1), an inhibitor of the vacuolar  $\text{H}^+$ -ATPase (Figure S3). Therefore, disrupting GNS561  
218 lysosomal localization protected against GNS561-mediated cell death. These results  
219 suggested that GNS561 antitumor activity in HepG2 cells is caused by its lysosomotropism.

220

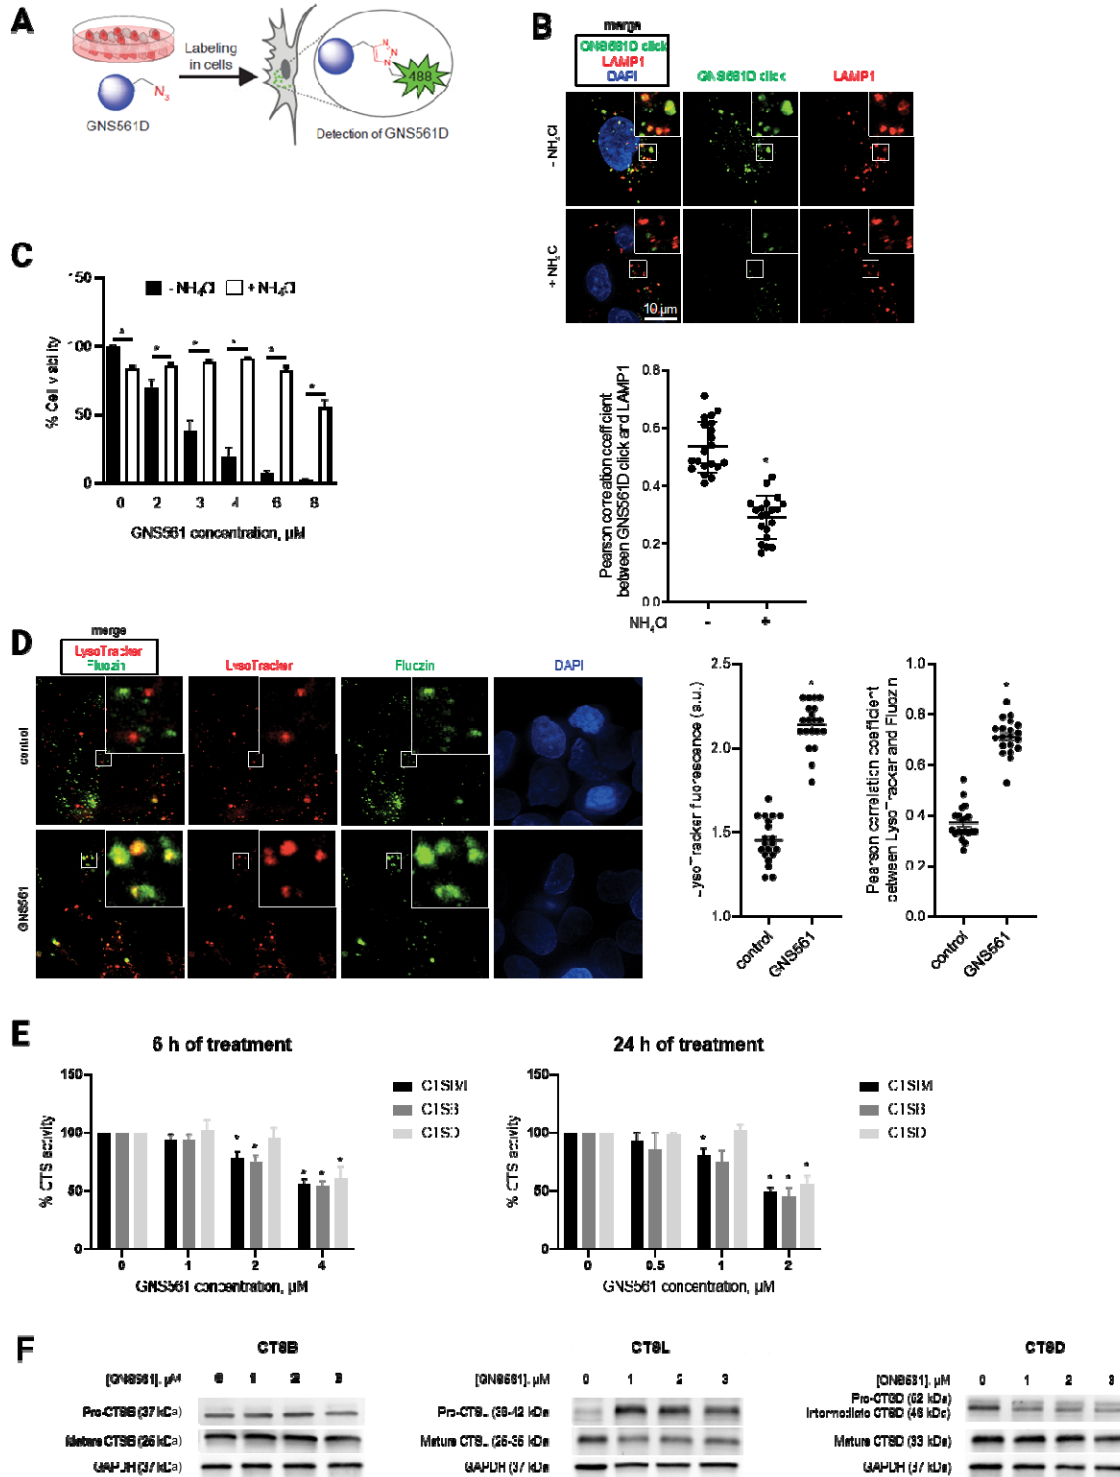

221

222 **Figure 4. The lysosomotropic agent GNS561 modulates lysosomal functions in the HepG2**  
 223 **cell line.** (A) Chemical labeling of GNS561D in cells. (B) Lysosomal localization of GNS561D  
 224 after NH<sub>4</sub>Cl pretreatment (20 mM) for 30 min and then treatment with GNS561D (10 μM)  
 225 and NH<sub>4</sub>Cl (20 mM) for 90 min. (C) Cell viability after 24 h of GNS561 exposure in the

226 presence or absence of  $\text{NH}_4\text{Cl}$  (20 mM). (D) Staining of lysosomes (LysoTracker) and unbound  
227  $\text{Zn}^{2+}$  (Fluozin) after GNS561 treatment (1 h, 10  $\mu\text{M}$ ). Quantification of LysoTracker  
228 fluorescence in arbitrary units (a.u.) (middle) and lysosomal unbound  $\text{Zn}^{2+}$  accumulation by  
229 Pearson correlation coefficient between LysoTracker and Fluozin (right). (E) Fold change of  
230 peptidase activity of cysteine cathepsins (including both cathepsins B and L) (CTSB/L),  
231 cathepsin B (CTSB) and cathepsin D (CTSD) after GNS561 treatment (6 h and 24 h) calculated  
232 in comparison with the control condition. (F) Representative immunoblotting of  
233 procathepsin B (precursor form) and mature CTSB (left), procathepsin L (precursor form) and  
234 mature CTSL (middle) and procathepsin D, intermediate and mature CTSD (right) after  
235 GNS561 treatment for 16 h. For all blots, GAPDH was used as a loading control. For all  
236 studies,  $n \geq 3$  biological replicates. Data represent the mean + SEM. For comparison, Student  
237 t-test was used for (C), (B) and (D), and one-way ANOVA with Dunnett's post hoc analysis  
238 was performed for (E). \* represents significant difference, at least  $p < 0.05$ .

239

#### 240 **GNS561 modulates lysosomal functions**

241 The GNS561 lysosomotropism-dependent cell death prompted us to examine GNS561  
242 capacity to modulate lysosomal characteristics and functions.

243 Following continuous exposure to GNS561, staining of LysoTracker, which is a reagent  
244 allowing the identification of the lysosomal compartment, increased in HepG2 cells (Figure  
245 4D), suggesting that GNS561 prompted a dose-dependent build-up of enlarged lysosomes.  
246 We therefore examined the enzymatic activity of three prominent lysosomal proteinases,  
247 two cysteine cathepsins B (CTSB) and L (CTSL), and aspartic cathepsin D (CTSD). After 6 and  
248 24 h of treatment, GNS561 significantly impaired, in a dose-dependent manner, the  
249 enzymatic activity of cathepsins (Figure 4E). However, this decreased activity did not relate  
250 to a direct GNS561-dependent inhibition of cathepsin activities (Figure S4). Based on the  
251 literature, depressed proteolytic activity of cathepsins may result from an increased  $\text{Zn}^{2+}$   
252 lysosomal concentration and/or altered maturation of cathepsin precursors. Indeed, it has  
253 been described that  $\text{Zn}^{2+}$  may downregulate the proteolytic activity of CTSB and CTSL  
254 (Lockwood 2010, Lockwood 2013, Lockwood 2019). We investigated whether GNS561  
255 modified unbound  $\text{Zn}^{2+}$  localization in HepG2 cells. As shown in Figure 4D, GNS561 induced a  
256 strong accumulation of unbound  $\text{Zn}^{2+}$  in lysosomes, as evidenced by colocalization of the

257 fluorescent signals of FluoZin and LysoTracker in the merged images. This increase in  
258 lysosomal unbound  $Zn^{2+}$  could explain the decreased proteolytic activity of CTSL and CTSB.  
259 Cathepsins are synthesized as inactive zymogens, which are converted to their mature active  
260 forms by other proteases or by autocatalytic processing (Turk et al. 2012). As depicted in  
261 Figure 4F, GNS561 did not impact CTSB maturation, while it impaired the maturation of both  
262 CTSL and CSTD (increase of precursor forms) and decreased their catalytic activity  
263 accordingly.

264 As GNS561 induced lysosomal dysfunction, the effect of GNS561 on the autophagic process  
265 was investigated. Herein, we showed that the GNS561-induced accumulation of light chain 3  
266 phosphatidylethanolamine conjugate was not enhanced in the presence of BafA1 (Figure  
267 S5), suggesting that GNS561 blocked autophagic flux.

268

#### 269 **PPT1 is a target of GNS561**

270 Since PPT1 is critical for lysosomal function and is described to be the molecular target of  
271 chloroquine derivatives (Rebecca et al. 2017, Rebecca et al. 2019), we investigated whether  
272 PPT1 could be a molecular target of GNS561. First, the binding of GNS561 to recombinant  
273 PPT1 was analyzed in vitro by nano differential scanning fluorimetry using HCQ as a positive  
274 control (Rebecca et al. 2019). In the presence of GNS561 and HCQ, we observed a significant  
275 dose-dependent decrease in PPT1 melting temperature (Figure 5A). Additionally, inhibition  
276 of PPT1 enzymatic activity was observed in HepG2 cells treated with GNS561 (Figure 5B).  
277 Moreover, the chemical mimetic *N-tert*-butylhydroxylamine (NtBuHA) attenuated autophagy  
278 inhibition associated with GNS561 (Figure 5C), indicating that inhibition of PPT1 function by  
279 GNS561 induced the observed anti-autophagy effect.

280 To determine whether inhibition of PPT1 function was responsible for the antitumoral  
281 activity of GNS561, HepG2 cells were treated with GNS561 with or without NtBuHA  
282 pretreatment. As shown in Figure 5D, NtBuHA partially prevented the antitumor activity of  
283 GNS561, as evidenced by the increased viability of cells pretreated with NtBuHA. The same  
284 rescue effect of NtBuHA pretreatment was observed for HCQ used as a positive control  
285 (Figure S7). After demonstrating that NtBuHA had no impact on GNS561 lysosomal  
286 localization (Figure S6), we validated that the impact of NtBuHA pretreatment was due to its

287 PPT1 mimetism, suggesting that inhibition of PPT1 function by GNS561 was partially liable  
 288 for its antitumoral activity.  
 289 The results of Rebecca et al. suggested that PPT1 inhibition could result in mTOR inhibition  
 290 through the displacement of mTOR from the lysosomal membrane (Rebecca et al. 2017,  
 291 Rebecca et al. 2019). Thus, we investigated the localization of mTOR after GNS561 treatment  
 292 using immunofluorescence microscopy. HCQ and EAD1 were used as positive controls (Sironi  
 293 et al. 2019). As shown in Figure 5E, GNS561 treatment, as well HCQ and EAD1 treatments,  
 294 significantly impaired mTOR localization to the lysosomal surface. Therefore, GNS561-  
 295 induced PPT1 inhibition resulted in displacement of mTOR from the lysosomal membrane  
 296 and consequently likely inhibited the mTOR signaling pathway.

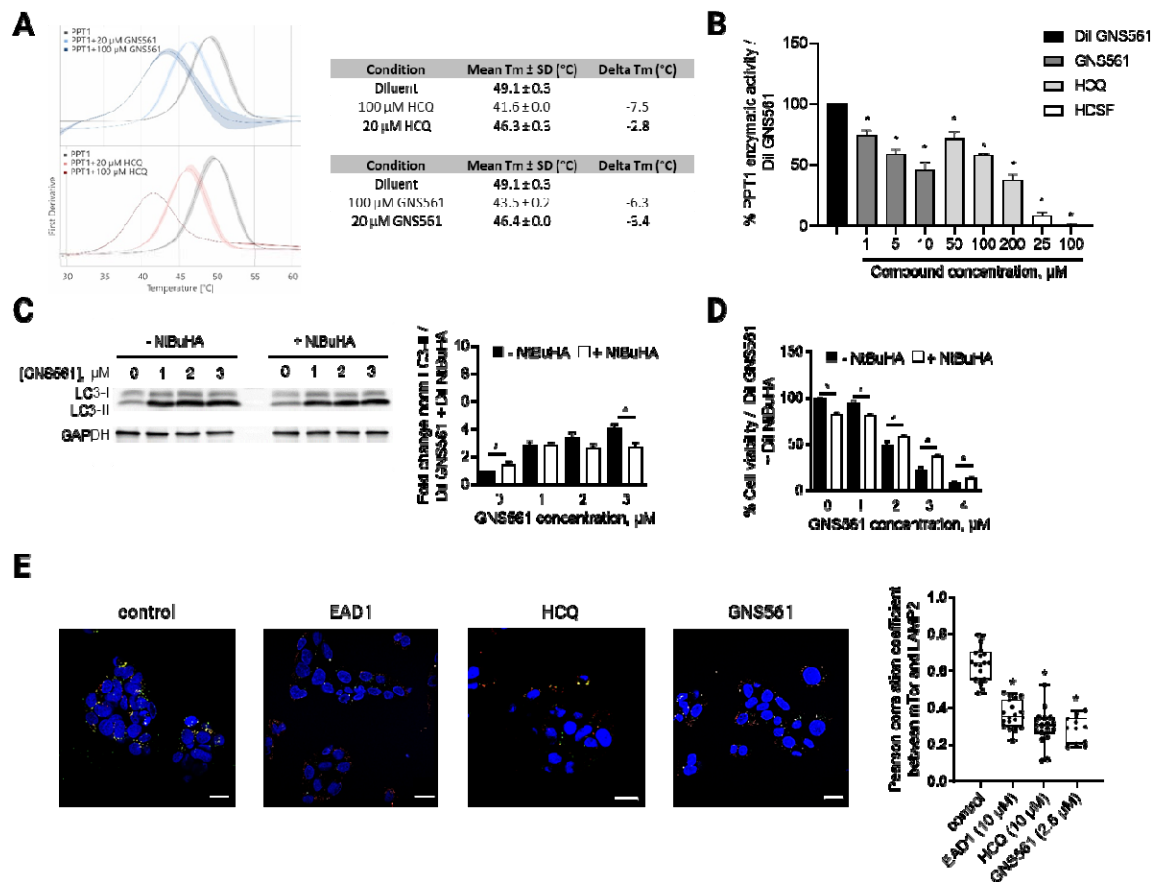

297  
 298 **Figure 5. GNS561 targets PPT1.** (A) Nano differential scanning fluorimetry assays comparing  
 299 GNS561 + PPT1 and HCQ + PPT1 against the apo-PPT1 ligand. Data represent the mean (solid  
 300 lines) ± SEM (shaded areas) of two experiments. (B) PPT1 enzymatic activity of HepG2 cells  
 301 treated with GNS561 for 3 h. HCQ and HDSF were used as positive controls. The results were  
 302 compared to the diluent of GNS561 (control condition). (C) Representative immunoblotting

303 of LC3-II in HepG2 cells treated with GNS561 for 16 h in the presence or absence of NtBuHA  
304 (8 mM). GAPDH was used as a loading control. Fold changes of normalized LC3-II level were  
305 calculated against the control condition (diluent of GNS561 + diluent of NtBuHA). (D) Cell  
306 viability percent against the control condition (diluent of GNS561 + diluent of NtBuHA) after  
307 24 h of treatment with GNS561 in the presence or absence of NtBuHA (8 mM). (E) Staining of  
308 lysosomes (LAMP2, green), mTOR (red) and nucleus (DAPI, blue) after treatment with  
309 GNS561 and two positive controls, EAD1 and HCQ, for 16 h. Pearson correlation coefficient  
310 between mTOR and LAMP2 was represented using box and whisker representation (min to  
311 max). Scale bars represent 20  $\mu\text{m}$ . In (B), (C) and (D), data represent the mean + SEM. For  
312 comparison, Student t-test was used for (C) and (D) and one-way ANOVA with Dunnett's  
313 post hoc analysis was performed for (B) and (E). For all studies except (A),  $n \geq 3$  biological  
314 replicates. \* represents significant difference, at least  $p < 0.05$ .

315

### 316 **GNS561 induces LMP and cathepsin-dependent cell death**

317 To characterize GNS561-induced changes in lysosomes, we analyzed LMP. To this end, we  
318 took advantage of the steady endocytic capacity of cells to load fluorescent dextran into  
319 lysosomes and the translocation of lysosomal localized dextran into the cytosol after LMP-  
320 inducing insult. Fluorescent dextran in healthy cells appears in dense punctate structures  
321 representing intact lysosomes, whereas after LMP, a diffuse staining pattern throughout the  
322 cytoplasm is seen. After GNS561 treatment, such diffuse dextran staining was observed  
323 (Figure 6A), suggesting an induction of LMP. As seen in Figure 6B, the loss of membrane  
324 integrity, which is the hallmark of LMP, was observed by transmission electron microscopy of  
325 HepG2 cells treated with 3  $\mu\text{M}$  GNS561 for 24 h. To confirm this effect, cathepsin localization  
326 was studied after GNS561 treatment. After 48 h of treatment, GNS561 decreased cathepsin  
327 staining (Figure 6C), indicating that cathepsins were released into the cytosol, thus validating  
328 LMP.

329 As cathepsin release into the cytosol after LMP may trigger cytosolic cellular death signaling  
330 (Oberle et al. 2010), we evaluated the role of cathepsins in GNS56-induced cell death. To this  
331 end, HepG2 cells were pretreated with an inhibitor of CTSD, pepstatin A, or an inhibitor of  
332 CTSB, CA-074-Me. Under these conditions, cell viability was partially rescued (Figure 6D and  
333 E), suggesting that the GNS561-induced apoptotic pathway is at least partially cathepsin-  
334 dependent.





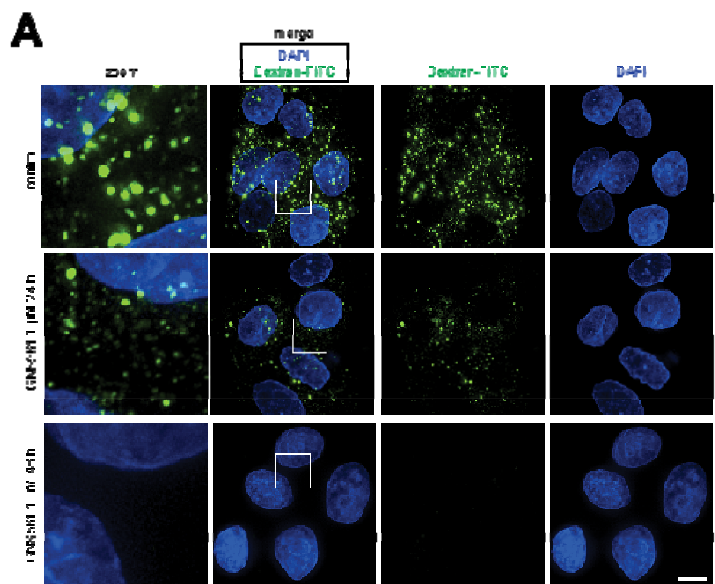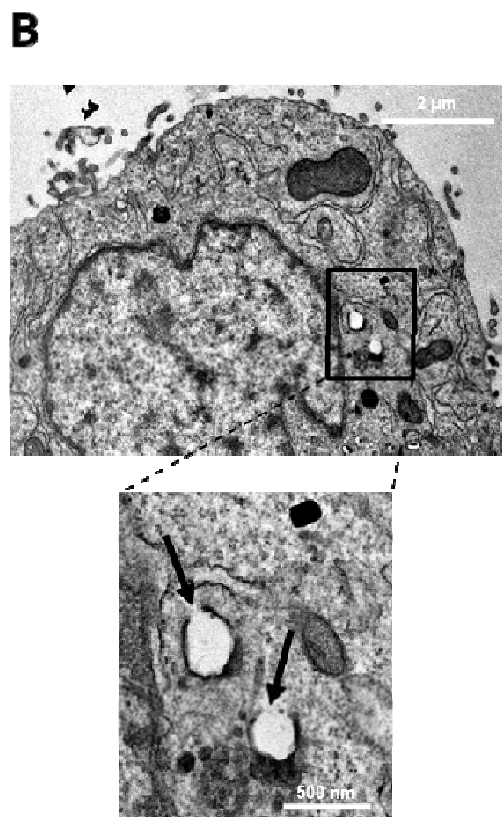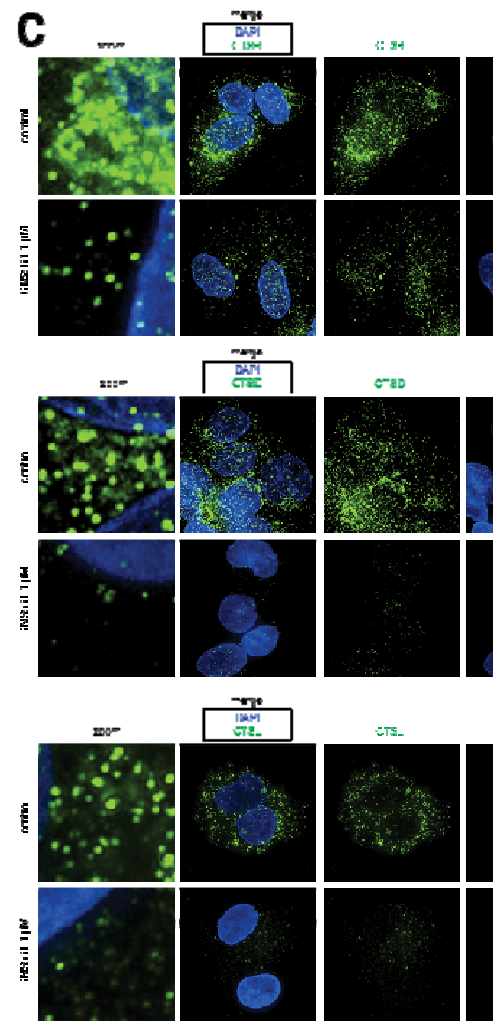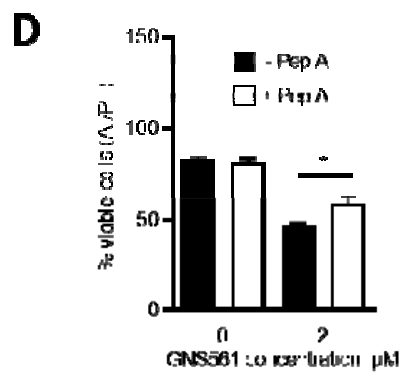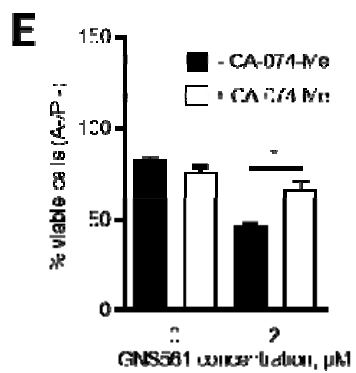

337 **Figure 6. GNS561 induces LMP and cathepsin-dependent cell death in HepG2 cells.** (A)  
338 Localization of FITC-dextran after GNS561 treatment for the indicated times. (B) Electron  
339 microscopy imaging of lysosomal membrane permeabilization (arrows) after GNS561  
340 treatment (3  $\mu$ M) for 24 h. (C) Localization of cathepsin B (CTSB), cathepsin D (CTSD) and  
341 cathepsin L (CTSL) after GNS561 treatment for 48 h. (D) Viable cell (A-/PI-) analysis by flow  
342 cytometry of cells pretreated or not with pepstatin A (Pep A) (5  $\mu$ M) for 1 h and then treated  
343 with Pep A (5  $\mu$ M) and GNS561 or with GNS561 alone for 48 h. (E) Viable cell (A-/PI-) analysis  
344 by flow cytometry of cells pretreated or not with CA-074-Me (20  $\mu$ M) for 1 h and then  
345 treated with CA-074-Me (20  $\mu$ M) and GNS561 or with GNS561 alone for 48 h. Scale bars in  
346 (A) and (C) represent 10  $\mu$ m. For all studies,  $n \geq 3$  biological replicates. Data represent the  
347 mean + SEM. For comparison, Student t-test was used. \* represents significant difference, at  
348 least  $p < 0.05$ .  
349  
350

351 **DISCUSSION**

352 Rapidly dividing and invasive cancer cells are strongly dependent on effective lysosomal  
353 functions. Lysosomes are acidic and catabolic organelles found in nucleated human cells that  
354 are responsible for the disposal and recycling of used and damaged macromolecules and  
355 organelles, as well as the assimilation of extracellular materials incorporated into the cell by  
356 endocytosis, autophagy, and phagocytosis. Increased autophagic flux and changes in  
357 lysosomal compartments in cancer cells have been shown to promote invasion, proliferation,  
358 tumor growth, angiogenesis, and drug resistance. Consistently, lysosomal changes are  
359 expected to sensitize cells to lysosome-targeting anticancer drugs (Kallunki et al. 2013).  
360 Many steps in the autophagy pathway represent potentially druggable targets and several  
361 clinical trials have aimed to inhibit autophagy by inhibiting lysosomal functions using CQ and  
362 HCQ. Unfortunately, CQ and HCQ failed to demonstrate consistent antitumor effects  
363 possibly due to subeffective anticancer concentrations in humans, even with high doses.  
364 Drug screening led us to identify GNS561 as a lead compound that displays lysosomotropism  
365 and significantly higher antiproliferative effects in human cancer cells compared to HCQ.  
366 We previously reported that GNS561 yielded antiproliferative activity in iCCA, inhibited late-  
367 stage autophagy, and induced a dose-dependent enlargement of lysosomes (Brun et al.  
368 2019). Based on these preliminary results, we further investigated the cellular mechanisms  
369 by which GNS561 may lead to lysosomal changes and death in cancer cells. In this study, we  
370 confirmed that GNS561 antitumor properties are strongly dependent on its lysosomotropic  
371 properties. In accordance with the hypothesis proposed in our previous study (Brun et al.  
372 2019), we showed here that GNS561 induced a dose-dependent increase in the number of  
373 enlarged lysosomes, LMP leading to cytosolic cathepsin release, caspase activation, and  
374 apoptotic cell death. These observations confirm prior reports that highlight the capability of  
375 lysosomotropic agents to cause lysosomal stress and lysosomal enlargement (Wang et al.  
376 2018). Moreover, studies demonstrated that lysosomal unbound  $Zn^{2+}$  buildup led to  
377 lysosomal swelling, LMP, release of lysosomal enzymes, and cell death (Hwang et al. 2008,  
378 Chung et al. 2009, Hwang et al. 2010, Yu et al. 2010). Further investigations are needed to  
379 identify the upstream signals that initiate LMP in GNS561-treated cells.  
380 PPT1, an enzyme involved in the removal of thioester-linked fatty acyl groups in proteins and  
381 thus subsequently enabling the degradation and intracellular trafficking of membrane-bound

382 proteins, plays a central role in the control of cellular autophagy. PPT1 is highly expressed in  
383 several cancer cell lines as well as in advanced stage cancers in patients (Rebecca et al.  
384 2019). Recent data have shown that lysosome-specific inhibitors targeting PPT1 can  
385 modulate protein palmitoylation and display antitumor activity in melanoma and colon  
386 cancer models (Rebecca et al. 2017). Our data showed that PPT1 acts as a molecular target  
387 of GNS561. GNS561 bound to PPT1 and inhibited its activity in cells. Cells treated with the  
388 chemical mimetic NtBuHA were partially resistant to GNS561-mediated cytotoxicity and  
389 attenuated GNS561-associated autophagic flux inhibition, suggesting that inhibition of the  
390 thioesterase activity of PPT1 is essential for the anti-autophagic and antitumoral effects of  
391 GNS561.

392 In our study, we observed that GNS561 modified the intracellular distribution and  
393 localization of mTOR. This is in accordance with previous studies showing that inhibition of  
394 PPT1 may displace the mTOR protein from the lysosomal membrane as a result of the  
395 inhibition of vATPase/Ragulator/Rag GTPase interactions (Sancak et al. 2010, Korolchuk et al.  
396 2011, Carroll et al. 2016, Rebecca et al. 2017, Rabanal-Ruiz and Korolchuk 2018, Rebecca et  
397 al. 2019, Sironi et al. 2019). It was also described that lysosomal mTOR localization brings it  
398 in close vicinity to its main regulator, Rheb, and that as a result, the mTOR/Rheb interaction  
399 can activate mTOR kinase activity leading to the phosphorylation of downstream effectors  
400 (Carroll et al. 2016). Consistently, we hypothesized that GNS561-induced PPT1 inhibition led  
401 to mTOR signaling pathway inhibition.

402 As previously observed in iCCA (Brun et al. 2019), we showed here that GNS561 induced a  
403 significant decrease in the enzymatic activity of cathepsins. This decreased activity is unlikely  
404 due to a direct inhibition of CTSL, CTSB and CTSD by GNS561 but rather could be the  
405 consequence of both impairment of CTSL and CTSD maturation and lysosomal unbound  $Zn^{2+}$   
406 accumulation. As cathepsin activity is optimal in acidic pH (Gieselmann et al. 1985, Turk et al.  
407 1999), we could also speculate that GNS561 may negatively influence the proteolytic activity  
408 of cathepsins by inducing an increase in lysosomal pH via PPT1 inhibition. In fact, other  
409 authors have shown that PPT1 deficiency in *Cln1*<sup>-/-</sup> mice disrupted the delivery of the v-  
410 ATPase subunit V0a1 to the lysosomal membrane, leading to a dysregulation of lysosomal  
411 acidification (Bagh et al. 2016). The authors suggested that S-palmitoylation by PPT1 may  
412 play a critical role in the trafficking of the V0a1 subunit of v-ATPase to the lysosomal  
413 membrane and in lysosomal pH regulation.

414 Based on prior studies, GNS561 was neither a zinc ionophore nor a zinc chelator (data not  
415 shown), unlike CQ (Xue et al. 2014). However, our hypothesis that GNS561-induced PPT1  
416 inhibition could lead to lysosomal deacidification could also explain the observed lysosomal  
417 unbound  $Zn^{2+}$  accumulation after GNS561 treatment. In fact, as lysosomal pH is mainly  
418 regulated by cation/anion movement across the lysosomal membrane, it was suggested that  
419 a proton motive force was required to mediate unbound  $Zn^{2+}$  efflux (Lockwood 2013, Bin et  
420 al. 2019).

421 In summary, GNS561-induced PPT1 inhibition may lead to two main mechanisms inducing  
422 cancer cell death. One is related to lysosomal deacidification, which induces lysosomal  
423 unbound  $Zn^{2+}$  accumulation, a decrease in the enzymatic activity of cathepsins, inhibition of  
424 autophagic flux, lysosomal swelling, LMP, cathepsin release, and caspase-dependent  
425 apoptosis. The other is linked to prevention of the interaction between v-ATPase and the  
426 Ragulator complex, blockage of mTOR lysosomal recruitment, impairment of mTOR–Rheb  
427 interaction and finally the inhibition of mTOR signaling pathway. Thus, by targeting PPT1,  
428 GNS561 acts as a regulator of autophagy and mTOR, two major processes that drive cancer  
429 aggressiveness. Finally, as lysosomes and autophagy are associated with adaptive  
430 mechanisms of resistance to mTOR inhibition (Xie et al. 2013), GNS561 can disable mTOR  
431 function and downregulate adaptive mechanisms of resistance.

432 An extensive preclinical program has been conducted to evaluate the antitumor activity,  
433 pharmacological properties and toxicology of GNS561. Our data showed that GNS561  
434 displays antiproliferative effects in several human cancer cells (cell lines and primary patient-  
435 derived cells) and that GNS561 was more potent than HCQ. Analysis of the whole-body  
436 tissue distribution of GNS561 in rats after repeated oral dosing of GNS561 showed that  
437 GNS561 was mainly concentrated in the liver, stomach and lung. The data are consistent  
438 with the basic lipophilic nature of GNS561 and with studies showing that basic lipophilic  
439 drugs show high lysosomal tropism and high uptake in lysosome-profuse tissues, such as the  
440 liver and the lung (Daniel and Wójcikowski 1997). As GNS561 had a high liver tropism, the  
441 effect of GNS561 on tumor growth in vivo was evaluated using two liver cancer models: one  
442 orthotopic human liver cancer xenograft mouse model (with an HCC patient-derived cell line,  
443 LI0752) and one DEN-induced cirrhotic rat model with HCC. These studies showed that  
444 GNS561 administered by oral gavage was well tolerated up to the doses of 50 mg/kg/day for  
445 6 days in mice and up to 15 mg/kg/day for 6 weeks in rats and induced significant antitumor

446 growth activity that was either comparable to or higher than sorafenib. In addition, in a DEN-  
447 induced cirrhotic rat model with HCC, the combination of GNS561 with sorafenib exerted an  
448 additive effect in controlling tumor progression and cell proliferation. Furthermore, instead  
449 of that observed with CQ and HCQ (Harder et al. 2018), the distribution of GNS561 into the  
450 central nervous system was limited. Inactivating PPT1 mutations have long been known to  
451 induce infantile neuronal cerebral lipofuscinosis and induce retinopathy during childhood  
452 (Metelitsina et al. 2016). Germline PPT1 mutations were shown to selectively affect the  
453 central nervous system, with no effects in other tissues. Prior clinical experience using CQ  
454 and HCQ showed that retinopathy was one of the major toxicities in patients (Marmor et al.  
455 2011). Authors have suggested that novel PPT1 inhibitors may take advantage of not  
456 crossing the blood-brain barrier to avoid retinal toxicity (Rebecca et al. 2019). Interestingly,  
457 our data shown that the disposition of GNS561 displays limited penetration into the brain in  
458 rats, consistent with the lack of neurological and retinal toxicity observed in the current  
459 Phase 1b/2a clinical trial of GNS561 (ClinicalTrials.gov).

460 In brief, our findings strengthen the importance of PPT1 and lysosomes as cancer targets.  
461 Recently, it was shown that PPT1 inhibition by CQ derivatives or genetic Ppt1 inhibition  
462 increases the antitumor activity of anti-PD-1 antibody in melanoma by M2 to M1 phenotype  
463 switching in macrophages and a reduction in myeloid-derived suppressor cells in the tumor  
464 (Sharma et al. 2020). As such, GNS561 represents a promising new candidate for drug  
465 development in HCC either alone or in combination with other drugs, such as anti-PD-1  
466 antibody.

467

468 **METHODS**

469 Details of the materials and methods are provided in the Supplementary Methods.

470

471 *Cell culture*

472 All cell lines were cultured in the presence of 5% CO<sub>2</sub> and 95% air in a humidified incubator  
473 and were maintained in medium containing 1% penicillin-streptomycin (Dutscher, #P06-  
474 07100) and 10% fetal bovine serum (HyClone, #SV30160.03C), except NIH:OVCAR3 and KG-1  
475 cell lines, which were cultured in medium supplemented with 20% fetal bovine serum.

476

477 *Animal models*

478 The animals were checked daily for clinical signs, effects of tumor growth and any other  
479 abnormal effects. For experiments involving the mouse model (performed in CrownBio  
480 facilities), the protocol and any amendment(s) or procedures involving the care and use of  
481 animals were reviewed and approved by the Institutional Animal Care and Use Committee of  
482 CrownBio prior to experimentation, and during the study, the care and use of animals was  
483 conducted in accordance with the regulations of the Association for Assessment and  
484 Accreditation of Laboratory Animal Care. For the rat model, all animals received humane  
485 care in accordance with the Guidelines on the Humane Treatment of Laboratory Animals  
486 (Directive 2010/63/EU), and experiments were approved by the animal Ethics Committee:  
487 GIN Ethics Committee No.004.

488

489 *Statistical analysis*

490 Statistical analyses were performed using Prism 8.4.3 software (GraphPad Software Inc., CA,  
491 USA). For datasets with normal distribution, multiple comparisons were performed using  
492 one-way ANOVA with Dunnett's post hoc analysis. The parametric Student t-test was used to  
493 compare two groups of data with normal distribution. Data are presented as the mean  
494 values ± standard error mean (SEM) unless stated otherwise. Statistical significance was  
495 defined as a p-value < 0.05 and has been indicated by an asterisk in all figures.

496

497



498 **SUPPLEMENTAL INFORMATION**

499 Supplemental Information can be found online.

500

501 **ACKNOWLEDGMENTS**

502 The authors are very grateful to Dr. Sebastian Müller and Dr. Raphaël Rodriguez from Curie  
503 Institute for mechanistic analysis, Pr. Thierry Levade and Dr. Nathalie Andrieu from CRCT for  
504 the PPT1 enzymatic assay, Keerthi Kurma and Seyedeh Tayebah Ahmad Pour for the Institute  
505 for Advanced Biosciences for technical support during animal experiments and Dr. François  
506 Autelitano, Dr. Marie Guillemot and Philippe Fabre for Zn<sup>2+</sup> localization analysis.

507

508 **AUTHOR CONTRIBUTIONS**

509 Conceptualization, S.B, E.R, F.B and P.H.; Methodology, S.B., F.B., T.D, P.H; Validation, S.B.,  
510 Z.M.J, G.L, J.S, T.S, T.D; Formal Analysis, S.B., Z.M.J, M.N, J.T, A.H, G.L, R.L, T.S, M.G.P, J.P.B;  
511 Investigation, Z.M.J, S.M., M.N, J.T, A.H, L.V, E.B, R.L, M.G.P, G.R; Resources, J.C, C.A;  
512 Data Curation, C.D, G.J; Visualization, S.B, Z.M.J; Supervision, S.B, F.B, P.H; Project  
513 Administration, S.B; Writing – original draft preparation, S.B.; Writing – review and editing,  
514 S.B., E.R, F.B., Z.M.J, M.R, G.L, C.S, and P.H.; Funding Acquisition, P.H.

515

516 **DECLARATION OF INTERESTS**

517 SB, ER, FB, SM, MR, MN, JT, EB, JC, CD, GJ, CS, CA and PH are employees of Genoscience  
518 Pharma. SB, ER, FB, CD, CS, CA and PH are shareholders of Genoscience Pharma. SB, FB, JC  
519 and PH are co-inventors of a pending patent. The other authors declare no competing  
520 interests.

521

## 522 REFERENCES

- 523 Aits, S. and Jaattela, M. (2013). Lysosomal cell death at a glance. *Journal of Cell Science*  
524 126(9): 1905-1912.
- 525
- 526 Bagh, M.B., Peng, S., Chandra, G., Zhang, Z. and Mukherjee, A.B. (2016). Dysregulation of V-  
527 ATPase Function Impairs Lysosomal Acidification in a Mouse Model of a Rare Lysosomal  
528 Storage Disease, INCL. *The FASEB Journal* 30(1\_supplement): 879.871-879.871.
- 529
- 530 Bin, B.-H., Lee, S.-H., Bhin, J., Irié, T., Kim, S., Seo, J., Mishima, K., Lee, T.R., Hwang, D.,  
531 Fukada, T., et al. (2019). The epithelial zinc transporter ZIP10 epigenetically regulates human  
532 epidermal homeostasis by modulating histone acetyltransferase activity. *The British Journal*  
533 *of Dermatology* 180(4): 869-880.
- 534
- 535 Bray, F., Ferlay, J., Soerjomataram, I., Siegel, R.L., Torre, L.A. and Jemal, A. (2018). Global  
536 cancer statistics 2018: GLOBOCAN estimates of incidence and mortality worldwide for 36  
537 cancers in 185 countries. *CA: a cancer journal for clinicians* 68(6): 394-424.
- 538
- 539 Brun, S., Bassissi, F., Serdjebi, C., Novello, M., Tracz, J., Autelitano, F., Guillemot, M., Fabre,  
540 P., Courcambeck, J., Ansaldi, C., et al. (2019). GNS561, a new lysosomotropic small molecule,  
541 for the treatment of intrahepatic cholangiocarcinoma. *Investigational New Drugs* 37(6):  
542 1135-1145.
- 543
- 544 Carroll, B., Maetzel, D., Maddocks, O.D., Otten, G., Ratcliff, M., Smith, G.R., Dunlop, E.A.,  
545 Passos, J.F., Davies, O.R., Jaenisch, R., et al. (2016). Control of TSC2-Rheb signaling axis by  
546 arginine regulates mTORC1 activity. *eLife* 5.
- 547
- 548 Chung, H., Yoon, Y.H., Hwang, J.J., Cho, K.S., Koh, J.Y. and Kim, J.-G. (2009). Ethambutol-  
549 induced toxicity is mediated by zinc and lysosomal membrane permeabilization in cultured  
550 retinal cells. *Toxicology and Applied Pharmacology* 235(2): 163-170.
- 551
- 552 ClinicalTrials.gov. " Study of GNS561 in Patients With Liver Cancer." ClinicalTrials.gov.
- 553
- 554 Daniel, W.A. and Wójcikowski, J. (1997). Contribution of lysosomal trapping to the total  
555 tissue uptake of psychotropic drugs. *Pharmacology & Toxicology* 80(2): 62-68.
- 556
- 557 Dolgin, E. (2019). Anticancer autophagy inhibitors attract 'resurgent' interest. *Nature*  
558 *Reviews. Drug Discovery* 18(6): 408-410.
- 559
- 560 Gieselmann, V., Hasilik, A. and von Figura, K. (1985). Processing of human cathepsin D in  
561 lysosomes in vitro. *The Journal of Biological Chemistry* 260(5): 3215-3220.
- 562
- 563 Harder, B.G., Blomquist, M.R., Wang, J., Kim, A.J., Woodworth, G.F., Winkles, J.A., Loftus, J.C.  
564 and Tran, N.L. (2018). Developments in Blood-Brain Barrier Penetration and Drug  
565 Repurposing for Improved Treatment of Glioblastoma. *Frontiers in Oncology* 8.
- 566
- 567 Hwang, J.J., Kim, H.N., Kim, J., Cho, D.-H., Kim, M.J., Kim, Y.-S., Kim, Y., Park, S.-J. and Koh, J.-  
568 Y. (2010). Zinc(II) ion mediates tamoxifen-induced autophagy and cell death in MCF-7 breast

569 cancer cell line. *Biometals: An International Journal on the Role of Metal Ions in Biology,*  
570 *Biochemistry, and Medicine* 23(6): 997-1013.  
571  
572 Hwang, J.J., Lee, S.-J., Kim, T.-Y., Cho, J.-H. and Koh, J.-Y. (2008). Zinc and 4-hydroxy-2-  
573 nonenal mediate lysosomal membrane permeabilization induced by H<sub>2</sub>O<sub>2</sub> in cultured  
574 hippocampal neurons. *The Journal of Neuroscience: The Official Journal of the Society for*  
575 *Neuroscience* 28(12): 3114-3122.  
576  
577 Kallunki, T., Olsen, O.D. and Jäättelä, M. (2013). Cancer-associated lysosomal changes:  
578 friends or foes? *Oncogene* 32(16): 1995-2004.  
579  
580 Kimura, T., Takabatake, Y., Takahashi, A. and Isaka, Y. (2013). Chloroquine in cancer therapy:  
581 a double-edged sword of autophagy. *Cancer Research* 73(1): 3-7.  
582  
583 Klempner, S.J., Myers, A.P. and Cantley, L.C. (2013). What a tangled web we weave:  
584 emerging resistance mechanisms to inhibition of the phosphoinositide 3-kinase pathway.  
585 *Cancer Discovery* 3(12): 1345-1354.  
586  
587 Korolchuk, V.I., Saiki, S., Lichtenberg, M., Siddiqi, F.H., Roberts, E.A., Imarisio, S., Jahreiss, L.,  
588 Sarkar, S., Futter, M., Menzies, F.M., et al. (2011). Lysosomal positioning coordinates cellular  
589 nutrient responses. *Nature Cell Biology* 13(4): 453-460.  
590  
591 Lockwood, T.D. (2010). The lysosome among targets of metformin: new anti-inflammatory  
592 uses for an old drug? *Expert Opinion on Therapeutic Targets* 14(5): 467-478.  
593  
594 Lockwood, T.D. (2013). Lysosomal metal, redox and proton cycles influencing the CysHis  
595 cathepsin reaction. *Metallomics: Integrated Biometal Science* 5(2): 110-124.  
596  
597 Lockwood, T.D. (2019). Biguanide is a modifiable pharmacophore for recruitment of  
598 endogenous Zn<sup>2+</sup> to inhibit cysteinyl cathepsins: review and implications. *Biometals: An*  
599 *International Journal on the Role of Metal Ions in Biology, Biochemistry, and Medicine* 32(4):  
600 575-593.  
601  
602 Manic, G., Obrist, F., Kroemer, G., Vitale, I. and Galluzzi, L. (2014). Chloroquine and  
603 hydroxychloroquine for cancer therapy. *Molecular & Cellular Oncology* 1(1): e29911.  
604  
605 Marmor, M.F., Kellner, U., Lai, T.Y.Y., Lyons, J.S., Mieler, W.F. and Ophthalmology, A.A.o.  
606 (2011). Revised recommendations on screening for chloroquine and hydroxychloroquine  
607 retinopathy. *Ophthalmology* 118(2): 415-422.  
608  
609 Metelitsina, T.I., Waggoner, D.J. and Grassi, M.A. (2016). BATTEN DISEASE CAUSED BY A  
610 NOVEL MUTATION IN THE PPT1 GENE: Retinal Cases & Brief Reports 10(3): 211-213.  
611  
612 Oberle, C., Huai, J., Reinheckel, T., Tacke, M., Rassner, M., Ekert, P.G., Buellesbach, J. and  
613 Borner, C. (2010). Lysosomal membrane permeabilization and cathepsin release is a  
614 Bax/Bak-dependent, amplifying event of apoptosis in fibroblasts and monocytes. *Cell Death*  
615 *and Differentiation* 17(7): 1167-1178.

616  
617 Pascolo, S. (2016). Time to use a dose of Chloroquine as an adjuvant to anti-cancer  
618 chemotherapies. *European Journal of Pharmacology* 771: 139-144.  
619  
620 Pérez-Hernández, M., Arias, A., Martínez-García, D., Pérez-Tomás, R., Quesada, R. and Soto-  
621 Cerrato, V. (2019). Targeting Autophagy for Cancer Treatment and Tumor  
622 Chemosensitization. *Cancers* 11(10): 1599.  
623  
624 Plantone, D. and Koudriavtseva, T. (2018). Current and Future Use of Chloroquine and  
625 Hydroxychloroquine in Infectious, Immune, Neoplastic, and Neurological Diseases: A Mini-  
626 Review. *Clinical Drug Investigation* 38(8): 653-671.  
627  
628 Rabanal-Ruiz, Y. and Korolchuk, V.I. (2018). mTORC1 and Nutrient Homeostasis: The Central  
629 Role of the Lysosome. *International Journal of Molecular Sciences* 19(3).  
630  
631 Rebecca, V.W., Nicastri, M.C., Fennelly, C., Chude, C.I., Barber-Rotenberg, J.S., Ronghe, A.,  
632 McAfee, Q., McLaughlin, N.P., Zhang, G., Goldman, A.R., et al. (2019). PPT1 Promotes Tumor  
633 Growth and Is the Molecular Target of Chloroquine Derivatives in Cancer. *Cancer Discovery*  
634 9(2): 220-229.  
635  
636 Rebecca, V.W., Nicastri, M.C., McLaughlin, N., Fennelly, C., McAfee, Q., Ronghe, A., Nofal,  
637 M., Lim, C.-Y., Witze, E., Chude, C.I., et al. (2017). A Unified Approach to Targeting the  
638 Lysosome's Degradative and Growth Signaling Roles. *Cancer Discovery* 7(11): 1266-1283.  
639  
640 Sancak, Y., Bar-Peled, L., Zoncu, R., Markhard, A.L., Nada, S. and Sabatini, D.M. (2010).  
641 Ragulator-Rag complex targets mTORC1 to the lysosomal surface and is necessary for its  
642 activation by amino acids. *Cell* 141(2): 290-303.  
643  
644 Sharma, G., Ojha, R., Noguera-Ortega, E., Rebecca, V.W., Attanasio, J., Liu, S., Piao, S., Lee,  
645 J.J., Nicastri, M.C., Harper, S.L., et al. (2020). PPT1 inhibition enhances the antitumor activity  
646 of anti-PD-1 antibody in melanoma. *JCI insight* 5(17).  
647  
648 Shi, T.-T., Yu, X.-X., Yan, L.-J. and Xiao, H.-T. (2017). Research progress of hydroxychloroquine  
649 and autophagy inhibitors on cancer. *Cancer Chemotherapy and Pharmacology* 79(2): 287-  
650 294.  
651  
652 Sironi, J., Aranda, E., Nordstrøm, L.U. and Schwartz, E.L. (2019). Lysosome Membrane  
653 Permeabilization and Disruption of the Molecular Target of Rapamycin (mTOR)-Lysosome  
654 Interaction Are Associated with the Inhibition of Lung Cancer Cell Proliferation by a  
655 Chloroquinoline Analog. *Molecular Pharmacology* 95(1): 127-138.  
656  
657 Turk, B., Dolenc, I., Lenarcic, B., Krizaj, I., Turk, V., Bieth, J.G. and Björk, I. (1999). Acidic pH as  
658 a physiological regulator of human cathepsin L activity. *European Journal of Biochemistry*  
659 259(3): 926-932.  
660

- 661 Turk, V., Stoka, V., Vasiljeva, O., Renko, M., Sun, T., Turk, B. and Turk, D. (2012). Cysteine  
662 cathepsins: From structure, function and regulation to new frontiers. *Biochimica et*  
663 *Biophysica Acta (BBA) - Proteins and Proteomics* 1824(1): 68-88.  
664
- 665 Verbaanderd, C., Maes, H., Schaaf, M.B., Sukhatme, V.P., Pantziarka, P., Sukhatme, V.,  
666 Agostinis, P. and Bouche, G. (2017). Repurposing Drugs in Oncology (ReDO)-chloroquine and  
667 hydroxychloroquine as anti-cancer agents. *Ecancermedicalscience* 11: 781.  
668
- 669 Wang, F., Gómez-Sintes, R. and Boya, P. (2018). Lysosomal membrane permeabilization and  
670 cell death. *Traffic* 19(12): 918-931.  
671
- 672 Xie, X., White, E.P. and Mehnert, J.M. (2013). Coordinate Autophagy and mTOR Pathway  
673 Inhibition Enhances Cell Death in Melanoma. *PLOS ONE* 8(1): e55096.  
674
- 675 Xu, R., Ji, Z., Xu, C. and Zhu, J. (2018). The clinical value of using chloroquine or  
676 hydroxychloroquine as autophagy inhibitors in the treatment of cancers: A systematic review  
677 and meta-analysis. *Medicine* 97(46): e12912.  
678
- 679 Xue, J., Moyer, A., Peng, B., Wu, J., Hannafon, B.N. and Ding, W.-Q. (2014). Chloroquine Is a  
680 Zinc Ionophore. *PLoS ONE* 9(10): e109180.  
681
- 682 Yu, L., McPhee, C.K., Zheng, L., Mardones, G.A., Rong, Y., Peng, J., Mi, N., Zhao, Y., Liu, Z.,  
683 Wan, F., et al. (2010). Termination of autophagy and reformation of lysosomes regulated by  
684 mTOR. *Nature* 465(7300): 942-946.  
685
- 686 Zhang, Y., Liao, Z., Zhang, L.-j. and Xiao, H.-t. (2015). The utility of chloroquine in cancer  
687 therapy. *Current Medical Research and Opinion* 31(5): 1009-1013.  
688
